# Supplementary material for: Extremely rapid and simple healing of a transparent conductor based on Ag nanowires and polyurethane with a Diels–Alder network
Source: Royal Society of Chemistry journal article supplement (doi:10.1039/c5tc04030b), 2015-12-23
Supplement: c5tc04030b1.pdf [file c5tc04030b1.pdf]

## Supplementary Information

### Extremely rapid and simple healing of transparent conductor based on Ag nanowires and polyurethane with Diels–Alder network

*Kyoung-hee Pyo, Da Hee Lee, Youngmin Kim\* and Jong-Woong Kim\**

Display Components & Materials Research Center, Korea Electronics Technology Institute, 68 Yatap-dong, Bundang-gu, Seongnam, Gyeonggi-do 463-816, Korea

E-mail: ymkim@keti.re.kr (Y. Kim), wyjd@keti.re.kr (J. W. Kim); Tel.: +82 31 789 7432 (Y. Kim), +82 31 789 7438 (J. W. Kim)

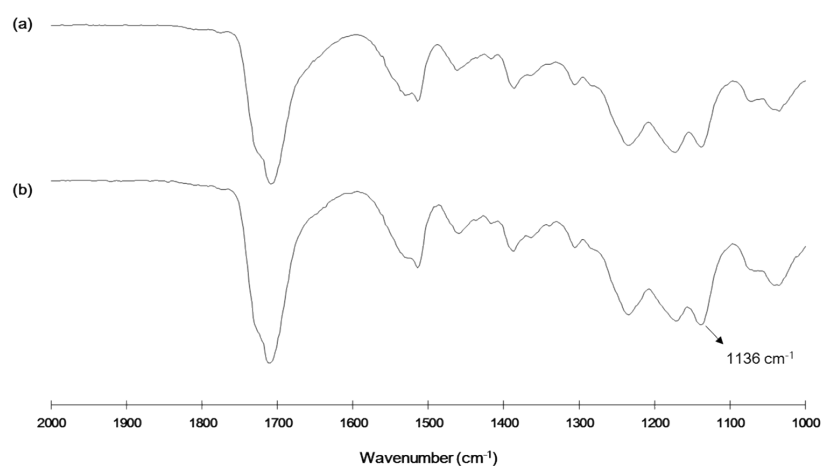

**Figure S1.** FTIR spectra of PU-A (a) before heating and (b) after heating at 120°C for 10 min.

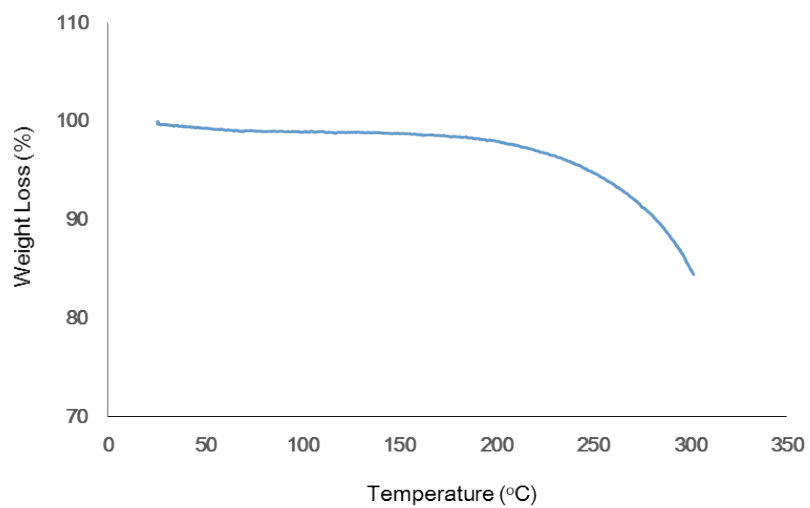

**Figure S2.** A TGA curve for PU-A.

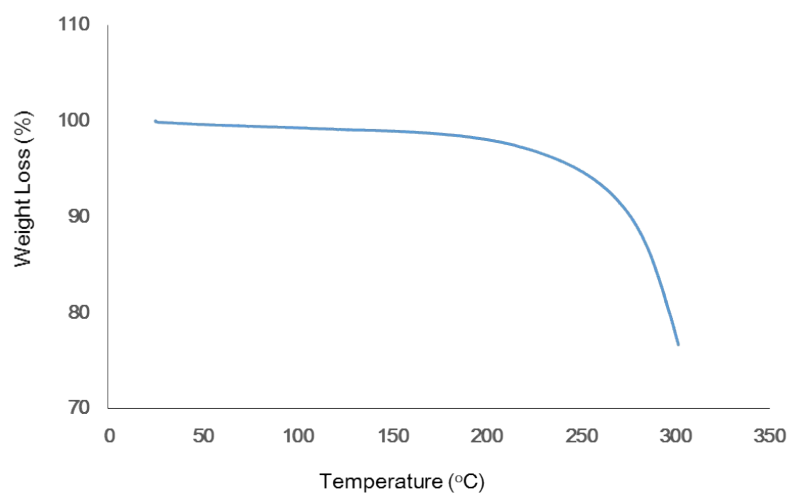

**Figure S3.** A TGA curve for PU-F.

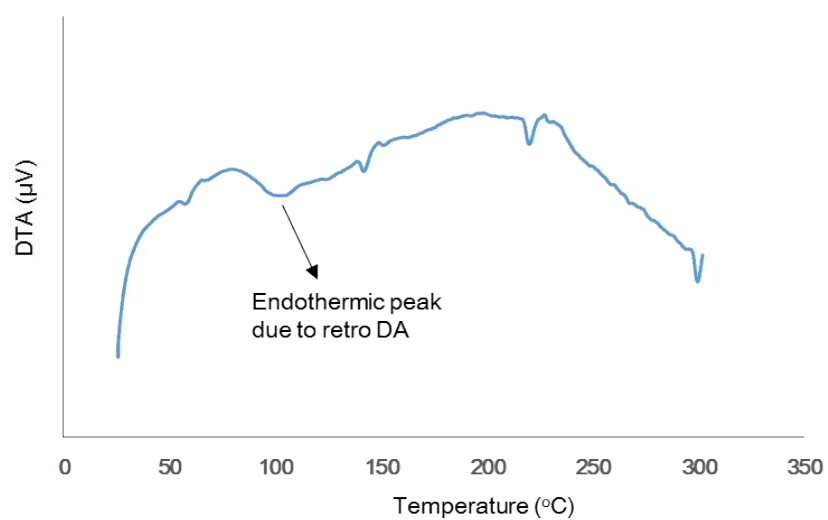

**Figure S4.** A DTA curve for PU-A.

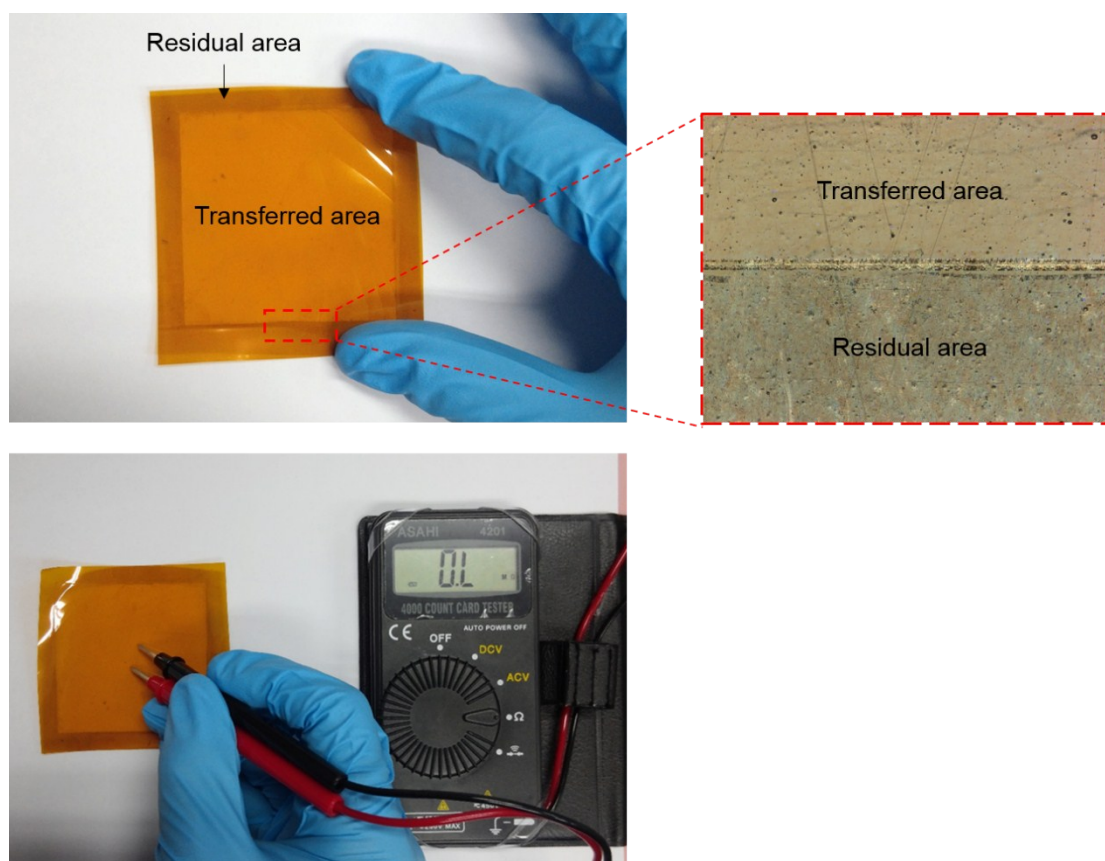

**Figure S5.** A Kapton film after AgNW transference. AgNWs performed on center area were perfectly transferred to the PU-A, resulting in no residue.

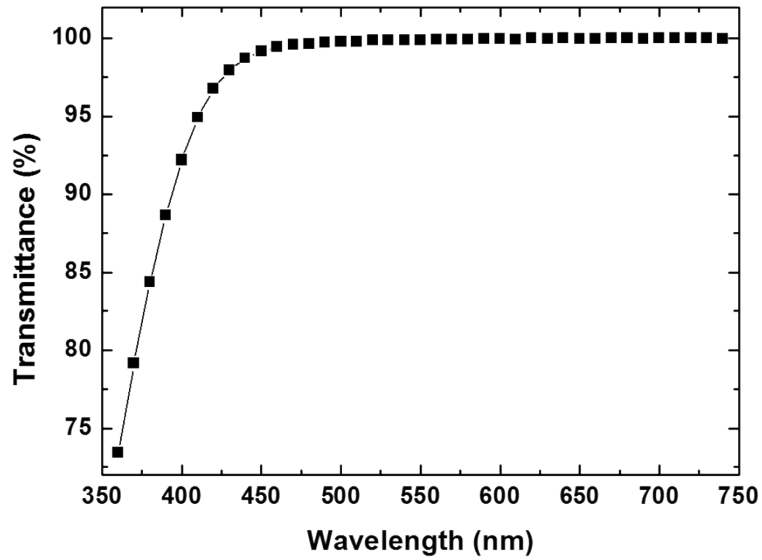

Figure S6. Measured transmittance of the PU-A.

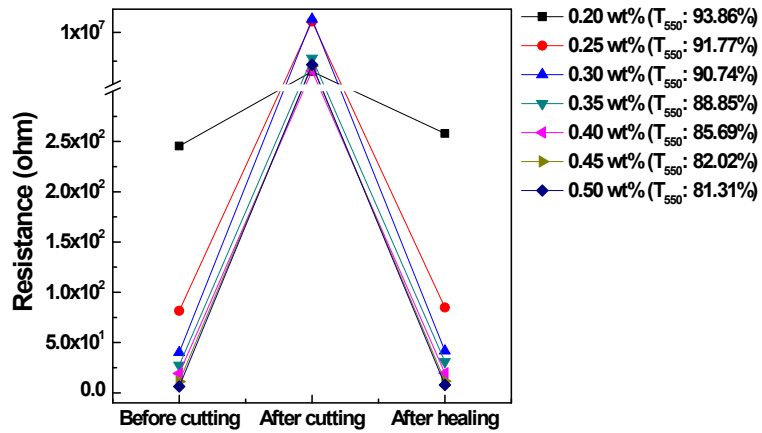

Figure S7. Resistance measured at various stages: before cutting, after cutting and after healing.
